# Supplementary material
Source: publisher figshare collection journal article supplement (https://gsapubs.figshare.com/ndownloader/files/28153275)
Supplement: Supplementary file 1 [file 28153275]

## Sheet: Sheet2
Zircon LA-ICP-MS rare earth element results
	analyse location	La	Ce	Pr	Nd	Sm	Eu	Gd	Tb	Dy	Ho	Er	Tm	Yb	Lu
		ppm	ppm	ppm	ppm	ppm	ppm	ppm	ppm	ppm	ppm	ppm	ppm	ppm	ppm
AL082-3-20	C	0.0740041	7.39013	0.232768	3.87681	8.35404	0.805967	49.0161	17.5745	233.774	87.9315	410.321	89.2631	743.192	141.246
AL082-3-5	C	0.0412339	4.77852	0.0887927	1.52203	3.64189	0.14586	22.1278	7.54141	96.386	34.4982	156.338	31.8332	267.388	49.2166
AL082-3-6	C	0.126252	9.75046	1.0498	14.889	16.8271	4.93653	55.1257	14.7961	156.58	50.067	211.245	43.5283	387.454	77.8849
AL082-3-9	C	21.1601	48.0395	3.97197	14.3183	3.87669	1.26188	13.5811	5.10605	74.0448	29.5926	148.842	34.3062	323.227	63.5133
AL082-3-12	C	0.0317943	6.05843	0.363872	5.90447	10.1171	2.17548	54.2536	17.5653	208.071	73.1638	322.057	65.0699	548.805	103.545
AL082-3-13	C	0.00649115	13.6588	0.0347897	0.941593	2.16811	0.210705	12.4145	4.60641	64.0885	25.4702	127.971	28.5292	258.075	51.8423
AL082-3-14	C	0.0209357	14.7037	0.12188	2.63844	6.71237	0.292828	46.814	17.278	242.045	93.9803	440.981	93.7833	776.254	145.869
AL082-3-15	C	0.0650038	22.3649	0.461124	7.31043	15.1979	0.359113	86.3209	28.5632	355.473	129.831	570.291	112.848	924.065	172.028
AL082-3-16	C	5.90819	80.6968	2.03813	10.6549	6.36513	1.13253	24.284	7.89001	100.96	37.4854	182.841	41.215	376.712	75.7998
AL082-3-10	C	16.7572	49.6547	5.15737	25.3381	8.30597	0.776213	26.0724	8.21965	101.739	38.0809	174.53	35.9791	303.919	57.5375
AL082-3-1	M	0.0706373	14.6581	0.182594	2.8656	4.98988	2.80541	22.2459	7.21452	87.8912	30.3566	144.038	31.4156	286.289	57.8225
AL082-3-2	M	0.00433971	0.633624	0.00252327	0.0609148	0.19608	0.156241	2.43356	1.76079	40.5278	25.1108	208.297	76.905	1098.42	307.445
AL082-3-3	M	0.0168246	2.64561	0.0101443	0.230115	0.557846	0.357096	3.09036	1.23454	15.707	5.9688	31.3194	7.68923	77.7808	17.3548
AL082-3-4	M	0.000752806	0.612779	0.00213602	0.0242664	0.121336	0.15179	2.49898	1.79078	39.4526	23.7572	171.811	53.6489	621.952	146.383
AL082-3-7	M	0.00070229	3.64873	0.00398537	0.0905524	0.423669	0.174728	3.69739	1.73731	30.1086	14.1398	83.7002	22.5566	239.93	54.3643
AL082-3-8	M	0.000702408	0.402598	0.000996509	0.0084907	0.0576171	0.0594772	0.977117	0.763944	19.1021	12.5733	101.659	35.6487	456.137	116.171
AL082-3-11	M	0.00499012	0.38235	0.00353975	0.014362	0.108334	0.0773325	1.61224	1.28953	31.7509	19.2141	150.721	51.0506	639.781	152.903
AL082-3-17	M	0.0423089	1.53536	0.0179859	0.204933	0.523736	0.510603	6.59382	3.43476	63.6707	31.8075	208.279	62.732	737.898	176.898
AL082-3-18	M	0.0109998	0.633504	0.00284775	0.0304712	0.0886458	0.0656615	1.13963	0.622773	11.8932	6.02334	39.2165	11.5749	135.055	33.1361
AL082-3-19	M	0.472155	23.5499	0.131198	1.3977	1.68687	1.12441	9.61978	3.12335	38.6247	13.8872	67.3778	16.1166	164.085	35.6342
AL082-1-1	M	0.077393	29.9914	0.2723	2.9137	7.48582	4.74662	38.2614	13.5196	154.846	48.2657	185.379	40.0205	351.876	54.0158
AL082-1-2	M	0.001954	1.83507	0.002499	0.09041	0.270225	0.132927	1.86485	0.942996	15.7554	7.87196	46.3372	14.7332	186.49	42.6821
AL082-1-3	M	0.006884	1.5005	0.001081	0.060661	0.229853	0.176654	1.8361	0.97306	16.0251	7.58549	45.1985	14.0213	172.57	38.7777
AL082-1-4	M	0.32464	64.4997	0.766313	7.31952	14.3518	8.09688	59.8169	19.1642	203.678	59.6713	217.416	46.1542	398.005	59.209
AL082-1-5	M	0	2.93689	0.004593	0.085057	0.318862	0.143249	2.11877	0.834117	12.0948	5.44861	30.5722	9.47006	119.873	28.0391
AL082-1-6	M	45.6142	138.318	10.1371	29.4728	14.9969	2.74678	44.1489	14.185	180.72	71.2564	342.002	87.4541	891.36	167.152
AL082-1-7	M	0.128685	78.8005	1.0585	10.4024	16.5183	8.35209	52.6491	15.6128	154.555	44.1615	161.544	35.1	316.347	51.1181
AL082-1-8	M	0.129057	105.882	1.38113	13.4752	21.2969	11.3348	78.149	24.0736	256.088	75.0604	274.529	58.2513	495.813	71.9868
AL082-1-9	M	0.002204	0.478976	0.004957	0.039107	0.070971	0.051369	0.636282	0.359262	6.26446	3.12079	17.829	5.45943	65.8225	14.4561
AL082-1-10	M	0.042142	12.4307	0.275363	2.62928	4.55919	2.85013	22.5184	7.93139	96.2563	33.3494	142.524	34.0973	332.566	57.9179
AL082-1-11	M	0.234411	62.1652	0.530628	5.50596	10.3522	5.51321	38.9093	11.7051	123.428	36.4955	137.888	29.9499	259.618	40.8781
AL082-1-12	M	0.010617	0.722906	0.004447	0.007796	0.107824	0.089337	1.19667	0.566042	9.77556	4.70396	27.0025	8.08867	97.096	21.5727
AL082-1-13	M	0.080149	34.7171	0.751245	7.86684	13.8713	7.4716	50.6676	15.997	178.103	58.239	237.42	55.082	509.066	84.1893
AL082-1-14	M	0.26951	30.023	0.889619	7.62144	10.932	5.62752	33.4547	9.4583	88.705	25.3438	92.6259	20.0274	178.631	30.8234
AL082-1-15	M	0.125739	46.174	1.06801	9.29638	12.5102	6.88099	45.0995	13.8165	149.184	46.7626	183.099	41.3318	375.104	60.3028
AL082-1-16	M	0.795322	132.262	5.06353	40.3459	48.3167	23.4176	135.318	36.4239	344.363	94.4724	327.774	67.5229	560.363	81.021
AL082-1-17	M	#DIV/0!	#DIV/0!	#DIV/0!	#DIV/0!	#DIV/0!	#DIV/0!	#DIV/0!	#DIV/0!	#DIV/0!	#DIV/0!	#DIV/0!	#DIV/0!	#DIV/0!	#DIV/0!
AL082-1-18	M	0.050957	21.3983	0.280593	3.20694	7.04667	4.63085	39.6934	15.188	189.045	66.0939	274.825	62.8706	573.301	91.4441
AL082-1-19	M	0.027719	13.6139	0.150206	1.7633	3.00475	1.58892	10.5006	3.27627	35.3466	11.1608	46.9394	11.4497	116.025	21.3792
AL082-1-20	M	0.029435	14.8513	0.248762	3.05362	6.08096	3.28348	24.5631	8.06663	90.7605	29.8138	122.205	28.1691	262.343	43.9261
AL089-3-4	C	0.165689	17.2769	0.174711	1.82152	10.7862	2.05629	100.628	49.2982	742.517	299.461	1435.53	315.813	3314.65	511.278
AL089-3-6	C	0	23.9445	0.0376125	1.15949	2.90058	1.49197	18.1183	6.85871	89.3835	34.8714	168.597	36.1334	385.589	70.7495
AL089-3-11	C	0	32.6903	0.169904	2.73311	5.83761	2.49449	34.9605	12.1563	165.19	59.9614	287.699	60.3378	634.508	112.558
AL089-3-1	M	0	3.18869	0.0197465	0	0.5987	0	7.96095	4.5165	87.0934	42.0104	235.75	57.8115	626.975	102.365
AL089-3-2	M	0	4.83733	0	0.445983	3.23977	1.05596	19.26	6.71155	75.6563	22.5772	91.5781	17.9493	185.109	31.1411
AL089-3-3	M	0	5.0164	0	0.574384	2.00879	0.94748	16.9914	6.19031	70.0755	20.252	81.8846	16.3702	170.032	28.0257
AL089-3-5	M	0	4.46922	0	1.12077	3.51871	0.839934	25.7732	12.5731	161.585	45.0077	152.303	23.8884	186.923	24.0209
AL089-3-7	M	0	27.1082	0.176931	0.932803	3.12015	1.18179	19.5074	7.55977	106.671	42.5053	218.699	51.9415	615.975	107.252
AL089-3-8	M	0	2.9919	0.0102268	0.318574	1.57985	0.253847	12.6204	4.68448	48.2675	12.5832	40.0091	7.23426	71.9193	11.7543
AL089-3-9	M	0	3.09769	0.00066436	0.244932	1.634	0.142575	8.03241	3.63537	37.1382	10.3349	34.9674	6.03324	53.6567	7.77663
AL089-3-10	M	0.0928783	5.32894	0	0.347299	1.94274	0.89453	17.1276	5.49979	54.3933	14.9356	50.2469	8.7202	84.6967	13.4512
AL089-3-12	M	0	5.16745	0	0.389972	1.92957	0.559168	14.0632	5.00543	50.244	13.1543	44.6019	7.53653	65.0309	9.4987
AL089-3-13	M	0	4.69573	0.0303123	0.418862	1.77543	0.446079	14.6701	5.77167	69.9114	22.4847	89.4234	18.2145	187.634	28.1892
AL089-3-14	M	0.0991228	4.98512	0.0220563	0.465676	1.50054	1.11796	17.4578	6.09083	65.6888	17.6448	63.306	11.1706	102.718	16.7408
AL089-3-15	M	0.00441404	5.34926	0.112984	0.482482	2.87455	1.01938	19.8843	6.7583	68.4666	18.5468	66.4769	11.271	108.015	17.8409
AL089-3-16	M	0.0832523	11.4567	0.0805847	0.556259	3.33537	1.20786	24.2918	9.23193	118.386	41.967	198.448	43.6585	472.943	84.2647
AL089-3-17	M	0	2.14538	0.0184914	0.269515	1.68152	0.279801	25.3438	15.3808	222.786	69.5937	244.186	36.2	275.237	36.7306
AL089-3-18	M	2.68003	14.1632	0.710873	3.66963	3.85494	0.556843	29.8719	11.6883	153.844	53.599	253.75	57.8321	623.453	106.482
AL089-3-19	M	0.0609099	8.62194	0.0313894	1.02077	2.66242	1.57226	29.0646	9.83274	98.3818	27.4787	103.03	19.4561	186.362	31.1964
AL089-4-3	C	0	30.6331	0.274378	3.33466	6.34767	1.99882	27.815	8.6798	109.456	38.8684	179.506	42.4689	489.231	74.2257
AL089-4-22	C	0.129818	4.15916	0.0970863	0.572044	2.5702	0.286163	21.0318	10.5354	145.481	51.1781	245.156	59.1977	719.343	101.493
AL089-4-1	M	0.110351	9.10315	0.0428913	0.23381	2.53346	0.644263	14.9573	4.87994	60.215	20.8891	100.835	24.7113	289.989	44.0921
AL089-4-2	M	0.0014564	9.20581	0.0772945	0.790358	1.87427	0.41149	13.9327	4.62896	54.9758	17.923	81.6292	19.0304	216.83	31.2722
AL089-4-4	M	0.128077	9.67572	0.0858179	0.943022	1.92315	0.236108	12.8728	3.94927	44.957	14.6135	63.591	14.296	159.558	23.5558
AL089-4-5	M	0.042481	6.90245	0.054059	0.07051	0.848295	0.321242	9.49371	3.44308	42.2011	15.6583	73.0517	17.4009	196.01	30.8761
AL089-4-6	M	0	10.0617	0.0583292	0.41935	3.17608	0.568345	17.5366	5.52511	63.6406	21.1037	97.6505	22.1445	246.744	40.3706
AL089-4-7	M	0.00531773	9.03981	0	0.575262	1.89108	0.228315	13.6664	4.35279	49.7824	17.0638	79.2506	16.9312	191.565	31.2749
AL089-4-8	M	0.01252	9.67198	0	0.3445	1.22781	0.283252	8.96196	3.10754	33.1898	11.3154	52.8296	11.0875	127.215	19.6194
AL089-4-9	M	0.0662007	9.11856	0.00333716	0.999715	3.22132	0.453291	16.8907	5.40263	61.6629	20.1042	88.5624	19.6269	211.163	33.157
AL089-4-10	M	0.0918222	9.90018	0	0.970749	3.13615	0.4452	21.2085	6.82939	78.38	25.2064	119.065	26.6045	306.473	47.945
AL089-4-11	M	0	6.46247	0.0980445	0.412535	2.36011	0.397324	16.9733	6.0341	68.1725	22.3975	96.8609	21.068	229.115	34.4764
AL089-4-12	M	0.147651	9.20956	0	0.662515	1.25007	0.459241	12.046	3.83718	42.6417	14.0858	64.0463	14.6786	158.998	25.8171
AL089-4-13	M	0.0899953	4.7199	0	0.204202	0.24263	0.208785	5.32119	2.11421	22.301	7.28368	29.7737	5.98882	58.3937	8.8752
AL089-4-14	M	0.011874	9.22191	0.0434873	0.71734	1.5003	0.202229	15.8112	4.41991	52.7662	17.5692	81.132	17.9423	200.482	33.4312
AL089-4-15	M	0	10.5513	0.0410851	0.0667448	1.85068	0.449177	19.3131	6.38275	66.6097	21.7918	100.161	22.0064	247.425	38.544
AL089-4-16	M	0.0871447	4.53368	0.099799	0.400533	2.13039	0.472786	17.125	5.55476	61.8428	17.3773	67.9854	12.9823	128.994	20.1897
AL089-4-17	M	0	7.78946	0.0859213	0.95916	1.51869	0.0589883	10.8198	3.40322	44.894	16.0222	83.3619	19.193	216.896	37.199
AL089-4-18	M	0	4.68374	0.0393454	0.544489	3.0787	0.677258	16.4219	5.28076	57.042	15.3078	55.4769	9.58666	96.4548	14.082
AL089-4-19	M	0.129554	9.80236	0.0507491	0.412602	1.92715	0.187714	11.5647	3.5178	41.4196	13.361	63.042	13.3211	150.094	24.8485
AL089-4-20	M	0	8.74907	0.142086	0.0754983	1.20264	0.312452	11.4815	4.16027	49.3356	17.5929	84.6584	19.3774	216.324	37.2468
AL089-4-21	M	0	9.12908	0.0172099	0.619949	1.86855	0.448716	13.0404	4.46678	54.7981	19.1931	91.7127	20.9551	233.888	39.1393
AL076-1-3	C	0.265788	37.443	0.295369	1.84803	3.62273	0.514574	19.9324	7.45369	105.108	44.0192	231.583	53.9487	615.674	119.081
AL076-1-4	C	12.1175	50.4546	2.98735	14.524	4.97372	1.33663	19.049	6.42352	86.4802	35.3823	182.994	42.7067	479.311	92.8546
AL076-1-5	C	0.302875	35.2572	0.135197	1.37934	2.47497	0.417901	16.8565	6.33317	87.3071	36.246	184.761	42.7754	475.308	89.2557
AL076-1-9	C	0.685879	32.5524	0.255674	1.4491	2.95616	0.370184	15.3411	5.73652	79.309	33.7811	180.175	41.0892	464.126	88.4835
AL076-1-12	C	0.019047	42.1187	0.148261	2.81096	7.6976	1.78913	46.5017	16.1182	205.216	78.7352	372.719	77.3962	813.04	145.711
AL076-1-13	C	27.5981	104.418	10.5705	54.3054	24.0451	3.18938	51.7035	13.8568	149.091	50.1718	230.433	47.7425	522.81	96.6975
AL076-1-14	C	0.0133269	20.0115	0.0407314	1.08036	2.10001	0.367419	12.8631	4.93053	66.9239	28.3701	147.286	34.4003	393.559	77.0402
AL076-1-18	C	0.145623	29.1092	0.120819	1.11453	2.97365	0.434047	18.1473	6.88157	95.0678	38.8206	200.12	46.8682	525.571	100.721
AL076-1-20	C	2.01184	32.8171	0.820606	5.1038	4.50728	0.583692	24.7	8.66555	118.102	45.2059	221.019	47.9543	500.744	89.217
AL076-1-21	C	5.82982	42.8652	1.81844	10.0766	4.05864	0.928755	19.9556	6.96643	91.1436	36.4364	193.601	44.2798	513.708	96.2451
AL076-1-1	M	0	1.28156	0.0313413	0	0.3747	0.402479	5.55305	4.28498	72.823	32.5473	168.534	35.4245	354.759	59.7243
AL076-1-2	M	0.00637511	0.666245	0.0523155	0	0.685967	0.405005	5.00072	3.33399	61.8732	29.9788	163.824	36.547	391.176	68.1116
AL076-1-6	M	0.0153083	0.795324	0.0647157	0.462599	0.19412	0.516329	4.55135	2.95767	58.1757	26.4164	148.854	34.92	374.449	67.3496
AL076-1-7	M	0.0100046	0.682431	0	0	0	0.0653291	2.88368	1.52329	30.1633	13.5154	69.8165	15.8639	173.523	30.8693
AL076-1-8	M	0.057815	1.2441	0	0.32832	0.522671	0.190538	5.82817	3.62667	61.3355	28.4071	148.614	33.3087	349.998	62.198
AL076-1-10	M	0.0269804	0.396241	0	0.246966	0.536343	0	1.44905	1.12251	18.5608	7.69414	37.4216	7.84593	83.53	13.6162
AL076-1-11	M	0	0.731756	0.0179284	0	0.180395	0.106259	3.65467	2.43296	43.7925	20.3927	110.246	25.0457	272.527	50.1561
AL076-1-15	M	0.0739871	0.929119	0.0574507	0.279828	0	0.0806319	4.9293	3.11881	54.8197	24.1758	127.025	27.2321	285.488	49.1276
AL076-1-16	M	0	1.67935	0.0637065	0.267384	0.710599	0.350629	8.52431	4.84405	82.6398	34.2051	172.942	36.252	362.866	60.1551
AL076-1-17	M	0.0147672	1.04615	0	0.361353	0.168756	0.281886	6.21875	3.98878	67.9347	31.8737	171.532	38.7586	410.745	71.7026
AL076-1-19	M	0	1.0762	0.0590677	0.00292565	0.0327531	0.248065	5.25369	2.973	54.7303	24.7745	131.281	29.2549	309.304	54.5507
AL007-3-3	C	12.2	58.7	4.54	25.8	12.6	1.87	34.6	8.58	101	34.3	156	31.7	330	58.3
AL007-3-5	C	0.07	10.1	0.075	0.29	0.59	0.45	6.14	2.69	48.8	23.2	148	40.5	523	106
AL007-3-10	C	0.041	6.77	0.036	1.87	4.4	0.48	29.2	8.82	122	44	203	40.1	405	68.7
AL007-3-11	C	5.84	58	2.08	12.1	8.53	1.5	28.7	7.95	98.9	34.3	170	36.2	396	71.6
AL007-3-13	C	0.73	14.3	0.38	3.26	4.41	0.61	23.6	7.24	102	37.6	191	40.9	455	82.5
AL007-3-20	C	0.046	25.8	0.29	5.1	11.5	1.01	62.7	17.6	204	64.4	274	50.5	504	85.4
AL007-3-1	M	0.81	17.5	0.3	2.11	3.59	2.48	23.4	6.32	66.4	18.8	73.6	13.4	124	19.7
AL007-3-2	M	0	17.5	0.019	0.92	4.75	2.75	39.1	11.5	127	36.6	138	24.2	218	32
AL007-3-4	M	0	23.6	0.2	1.44	5.9	2.86	24.7	6.53	67.7	18.1	68.3	12.5	114	18
AL007-3-6	M	0.031	40.6	0.1	3.32	9.79	5.93	73.4	21	228	61.5	231	39.2	345	47.9
AL007-3-7	M	0.54	172	2.43	31.9	37.1	19.7	130	32.1	325	86.2	335	60.8	558	82.9
AL007-3-8	M	0.23	47.9	0.2	3.88	10.2	6.02	69.1	19.7	208	55.9	204	35.1	315	43.8
AL007-3-9	M	0.089	43.3	0.16	1.82	8.91	4.97	68.2	21	227	61	228	37.7	326	44.7
AL007-3-12	M	0.031	17.8	0.073	0.68	3.21	2.32	28.2	9.05	104	28.4	112	19.7	186	26.6
AL007-3-14	M	0.13	16.9	0.042	0.9	3.86	2.19	29.8	8.96	104	30.3	119	20.5	196	27.5
AL007-3-15	M	0.037	15.6	0.052	0.42	3.86	2.26	27.2	9.13	108	31.8	128	23.8	228	34.1
AL007-3-16	M	0.045	12	0.048	0.65	2.03	1.59	21.1	6.26	71.5	21.2	85.5	15.7	154	23.6
AL007-3-17	M	0.24	21.7	0.097	1.42	4.14	3.16	37.6	11.8	141	43.7	188	36	362	57.2
AL007-3-18	M	0.11	61.4	0.8	10.2	13.5	7.23	52.1	12.9	129	35.9	147	27.1	275	44.4
AL007-3-19	M	0	25.2	0.051	0.85	4.36	3.23	38.8	12.2	133	37.3	137	23.9	220	30.5
AL007-3-21	M	0	17.7	0	0.66	2.9	2.04	26.9	9.08	105	30.6	117	20.8	195	28.2
AL007-3-22	M	0.042	21.6	0.04	1	4.65	2.86	37.4	11.2	119	31.7	119	20.6	184	26.3
AL007-3-23	M	0.011	14.8	0.042	0.95	2.78	1.76	22.3	7.26	83.2	23.8	93.2	16.9	150	21.5
AL007-3-24	M	5.53	73.9	2.34	19	17.4	7.4	68.2	16	159	41.3	146	24.2	218	30.4
AL007-3-25	M	0.016	32.2	0.12	1.82	6.45	3.74	49.4	14.9	165	45.6	171	29.1	258	36.2
AL007-3-26	M	0.083	21.6	0.011	0.8	3.46	2.17	28.3	8	90.3	23.4	90.4	15	137	19.1
AL069-6-6	C	0.077	41	0.17	2.55	4.29	0.79	21.1	7.65	104	41.1	207	47.6	452	94.8
AL069-6-7	C	0.011	1.53	0.071	1.59	4.23	0.26	27.8	10.5	142	55.3	271	58.3	518	102
AL069-6-1	M	4.56	41.3	1.91	12.1	11.4	0.85	54.4	18.2	228	83.9	395	85.1	757	152
AL069-6-2	M	11.1	58.4	4.35	22.4	11.2	0.68	44.9	14.6	183	66.5	314	66.6	591	116
AL069-6-3	M	14.5	64	5.16	26.2	13.2	1.71	43.5	12.9	154	54.4	253	53.9	482	99.4
AL069-6-4	M	0.017	24.8	0.18	3.39	7.02	0.89	35	11.3	141	52	245	53.2	478	97.3
AL069-6-5	M	14.1	85.2	5.72	32	20.5	1.77	77.4	23.3	275	95.7	437	91.6	799	158
AL069-6-8	M	27.9	104	11.1	57.4	25.9	1.56	81.6	25	309	109	513	107	954	190
AL069-6-9	M	0.036	29.4	0.41	6.49	11.1	1.86	47.5	14.7	175	62.1	290	60.9	539	109
AL069-6-10	M	8.68	43	3.42	18.2	11.6	0.75	48.8	16.1	204	76.5	369	81.5	740	149
AL069-6-11	M	0.0046	21.6	0.11	2.44	6.37	0.5	38.3	14.1	184	69.9	338	73.8	668	136
AL069-6-12	M	7.13	45.8	3.37	16.3	14.4	0.92	71	24.5	318	120	579	128	1123	232
AL069-6-13	M	16.1	84.7	7.37	37.5	19.3	0.81	69.6	22.7	282	102	472	99.9	877	171
AL069-6-14	M	0.012	33.8	0.2	3.7	9.57	0.75	59.3	20.4	252	91.5	426	89.3	784	153
AL069-6-15	M	0.011	25	0.13	2.46	6.97	0.54	41.1	14.8	195	73.6	354	76.7	693	138
AL069-6-16	M	1.09	18.7	0.6	4.65	6.7	0.49	37.2	13.3	173	66.6	325	71.5	681	135
AL069-6-17	M	0.08	36.9	0.26	4.24	8.81	0.76	51.9	17.6	222	79.7	368	77.4	675	133
AL069-6-18	M	0.013	29.3	0.17	3.2	7.88	0.66	45.2	15.6	200	74	348	74.4	659	132
AL069-6-19	M	2.71	49	2.03	14.3	13.4	0.76	63	21.2	266	95.7	442	92.7	826	158
AL069-6-20	M	1.11	44.3	0.69	7.02	13.8	0.94	78.3	26.8	340	123	570	120	1048	205
AL069-6-21	M	6.43	50.6	2.78	15.5	16.5	0.72	80.1	27.4	350	127	596	126	1104	218
AL069-6-22	M	0.24	46	0.35	5.04	12.5	0.94	72.9	24.6	311	114	531	114	1016	201
AL069-9-1	M	0.011	2.09	0.026	0.4	2.98	0.62	34.2	23.6	395	151	748	178	1678	312
AL069-9-2	M	0.063	1.64	0.13	1.21	4.71	0.43	46.6	29	430	148	741	199	2180	441
AL069-9-3	M	0.011	0.58	0.024	0.34	1.77	0.15	17.6	11.5	180	65.3	334	91.9	1017	211
AL069-9-4	M	0.0044	1.22	0.015	0.37	2.85	0.43	30.8	21.6	367	143	733	183	1781	335
AL069-9-5	M	0.0016	0.88	0.0079	0.23	1.91	0.28	21.9	15.1	258	98.7	505	128	1264	239
AL069-9-6	M	0.014	0.72	0.021	0.29	1.7	0.28	18.9	13.1	219	83.6	429	111	1126	217
AL069-9-7	M	0.0044	0.71	0.01	0.25	1.96	0.21	23.4	15.4	239	86.5	436	116	1267	255
AL069-9-8	M	0.01	0.92	0.0086	0.22	1.75	0.27	21.2	14.7	246	93.2	464	116	1137	214
AL069-9-9	M	0.0064	1.11	0.02	0.31	2.46	0.4	26.3	18	300	114	570	142	1372	257
AL069-9-10	M	0.032	0.81	0.041	0.52	1.75	0.27	16.9	11.4	192	74.6	386	100	1024	201
AL104-1-1	M	0.000722295	61.6301	0.0483863	1.17781	4.33828	0.817371	30.1003	11.8895	159.669	62.0184	303.661	67.654	612.355	125.084
AL104-1-2	M	0.000838122	26.0193	0.0370321	0.927992	2.85631	0.527346	18.8959	7.28115	96.4359	37.405	182.93	40.7311	367.837	75.1902
AL104-1-3	M	0.0151071	52.7901	0.113584	2.07724	7.29537	1.2388	46.7689	16.9448	221.228	83.0399	390.42	83.965	733.404	143.396
AL104-1-4	M	0	23.4899	0.014104	0.492751	1.85937	0.358004	13.6533	5.34523	70.0933	27.5517	137.018	31.0266	291.943	61.2313
AL104-1-5	M	0.433157	52.9342	0.189837	2.80773	5.42387	1.08035	33.6949	11.5342	139.31	50.6708	226.802	46.7242	398.511	79.2385
AL104-1-6	M	18.2284	91.6791	6.65769	30.417	11.9423	1.41385	36.3887	12.3308	156.514	58.9431	287.453	63.0332	567.192	114.257
AL104-1-7	M	0.00327544	76.6189	0.113796	2.17274	7.47481	1.4361	50.0958	18.6179	242.361	90.6036	424.144	90.3962	788.051	155.883
AL104-1-8	M	0.00452491	66.3533	0.0612694	1.22368	4.36296	0.830184	30.0444	11.5379	150.105	56.0511	264.965	56.7863	498.319	99.3653
AL104-1-9	M	0.00339453	21.3813	0.0260056	0.686779	2.71731	0.447478	17.5426	6.70335	91.0034	36.2511	181.962	41.2675	380.982	79.9453
AL104-1-10	M	0.00656837	68.273	0.0936202	1.80717	6.51838	1.12599	40.4034	14.8854	191.268	69.9888	321.967	67.5045	578.893	112.198
AL104-1-11	M	0.101158	64.7808	0.1086	1.98947	5.84248	1.01703	39.2463	14.4998	185.762	68.9809	319.585	67.36	582.553	113.712
AL104-1-12	M	0.00959591	24.101	0.0455502	0.846767	3.36136	0.573197	25.5222	9.96423	134.427	52.9897	261.079	58.0645	528.469	107.381
AL104-1-13	M	0.000521796	52.3755	0.0584354	1.13749	3.68102	0.687198	25.1989	9.53897	124.884	46.8217	223.43	47.8183	422.881	83.4915
AL104-1-14	M	18.2285	91.3211	7.62418	38.4087	14.4658	1.47008	38.1667	11.9909	145.102	52.9554	243.712	51.1257	444.564	85.6817
AL104-1-15	M	0.000909338	32.2697	0.0460112	1.1533	3.37574	0.613104	23.5367	8.91625	117.088	44.7367	215.974	47.1324	420.137	83.6087
AL104-1-16	M	0.0807076	47.758	0.095144	1.53615	4.32549	0.875897	29.6956	10.9688	147.818	57.1394	281.966	62.8009	566.591	115.805
AL104-1-17	M	0.00373815	72.8252	0.0847161	1.65863	5.86899	1.21534	42.7957	16.029	203.946	74.2044	342.161	73.1589	639.359	124.142
AL104-1-18	M	0.0325695	28.5946	0.0477865	0.809933	2.61881	0.530074	19.6844	8.33009	110.906	42.1102	207.57	46.4665	429.73	89.5176
AL104-1-19	M	0.00314372	36.2602	0.0352861	1.07905	3.87052	0.703116	26.9767	10.3134	144.019	58.041	291.78	65.7819	606.799	126.057
AL104-1-20	M	0.000752563	34.8094	0.0525592	1.10293	3.69144	0.647404	22.8092	8.68399	115.961	44.5027	213.411	46.6171	417.841	84.1239
AL116-1-1	C	227.817	534.192	62.3328	271.422	53.902	1.78254	58.0037	10.8378	103.473	35.0453	169.377	36.9336	412.086	75.5683
AL116-1-18	C	0	0.653329	0	0.339316	1.85221	0.185918	15.481	9.06198	146.386	59.5257	317.341	77.3085	940.773	131.598
AL116-1-19	C	0	0.514282	0.0372172	0.526155	3.46156	0	25.3411	11.8304	178.347	71.6839	352.814	78.5081	865.701	131.534
AL116-1-2	M	0	20.9806	0.0778061	0.992094	2.80322	0.627826	20.649	7.97446	118.652	48.4415	268.537	65.1608	785.364	155.993
AL116-1-3	M	0	22.1809	0.0133735	0.981348	2.86298	0.447552	17.1474	6.5674	93.5345	38.1928	207.798	49.7949	611.845	120.358
AL116-1-4	M	0.102185	6.90152	0.0564703	0.328763	2.02427	0.411477	12.7836	5.00568	69.1584	27.8537	145.567	33.1076	388.142	74.9391
AL116-1-5	M	0	17.4474	0.0582697	0.606459	2.25892	0.501988	13.19	5.53511	76.7655	31.559	177.712	43.3236	533.528	105.454
AL116-1-6	M	0.0410865	6.98018	0.00058348	0.369244	1.45175	0.517719	8.26063	3.08724	44.3618	18.505	102.874	24.1802	293.452	58.3569
AL116-1-7	M	0	24.8259	0.0291672	1.29809	3.38527	0.900179	24.7315	9.85666	142.776	57.8561	314.049	76.5512	923.852	179.9
AL116-1-8	M	0.0697715	16.3279	0.0592892	0.290541	1.9444	0.329425	13.5541	5.57113	80.6895	33.3049	183.877	44.834	536.704	108.117
AL116-1-9	M	0	4.42325	0	0.373062	0.808014	0.289393	8.43433	3.43967	45.9711	17.5358	86.5557	19.3461	216.142	40.6678
AL116-1-10	M	0	8.75459	0.0139389	0.485261	1.85377	0.589421	12.1073	4.7576	65.1662	26.2339	137.303	32.1091	387.652	76.5545
AL116-1-11	M	0.044219	10.8502	0	0.840384	2.07122	0.718289	16.8981	6.81322	98.4062	39.8371	210.007	50.5474	609.019	117.776
AL116-1-12	M	0	26.6952	0.0164705	1.03716	2.38354	0.68134	20.2524	8.34173	112.81	46.305	257.805	61.2553	741.249	143.762
AL116-1-13	M	0	14.1861	0.031294	0.254953	1.59513	0.40104	13.3908	4.94563	70.8921	30.2958	165.723	40.4648	491.956	99.9099
AL116-1-14	M	0	38.8832	0.0155893	0.90318	5.16619	0.661455	29.6549	11.5987	160.412	63.5017	341.389	81.3475	953.773	182.584
AL116-1-15	M	0	33.3103	0.0880359	1.26153	3.66231	0.996197	26.4403	9.73195	134.803	54.0061	285.861	67.9766	828.357	152.236
AL116-1-16	M	0.0244937	31.9094	0.0582595	1.16784	4.17696	0.487998	24.0921	9.2343	132.531	52.3694	280.205	67.3261	795.381	144.758
AL116-1-17	M	0	8.43284	0.0336867	0.333359	0.926783	0.333824	8.31759	3.25574	47.1163	19.282	105.203	25.8336	331.878	58.4406
AL116-1-20	M	0.0457691	8.89686	0.0244656	0.0399209	1.29688	0.316284	8.45911	3.23351	47.729	19.0539	97.9247	24.5573	315.075	52.6675
